# Supplementary material for: Perturbation of cationic equilibrium by cucurbit-7-uril
Source: Royal Society of Chemistry journal article supplement (doi:10.1039/c7cp03583g), 2017-01-01
Supplement: c7cp03583g1.pdf [file c7cp03583g1.pdf]

**Perturbation of cationic equilibrium by cucurbit-7-uril**

Santosh Kumar Behera and G. Krishnamoorthy\*

Department of Chemistry, Indian Institute of Technology Guwahati, Guwahati-781039

Email: [gkrishna@iitg.ernet.in](mailto:gkrishna@iitg.ernet.in)

**Electronic Supplementary Information**

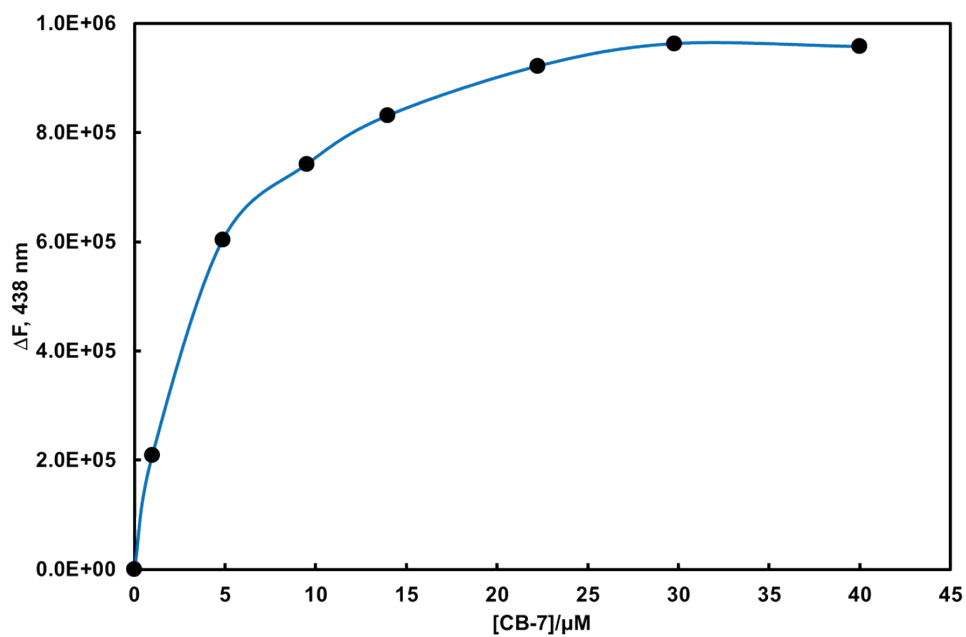

**Fig S1.** Fluorescence titration dot plot of MC2 of DMAPIP-b showing the complete binding at higher CB-7 concentration,  $\lambda_{\text{exc}} = 390 \text{ nm}$

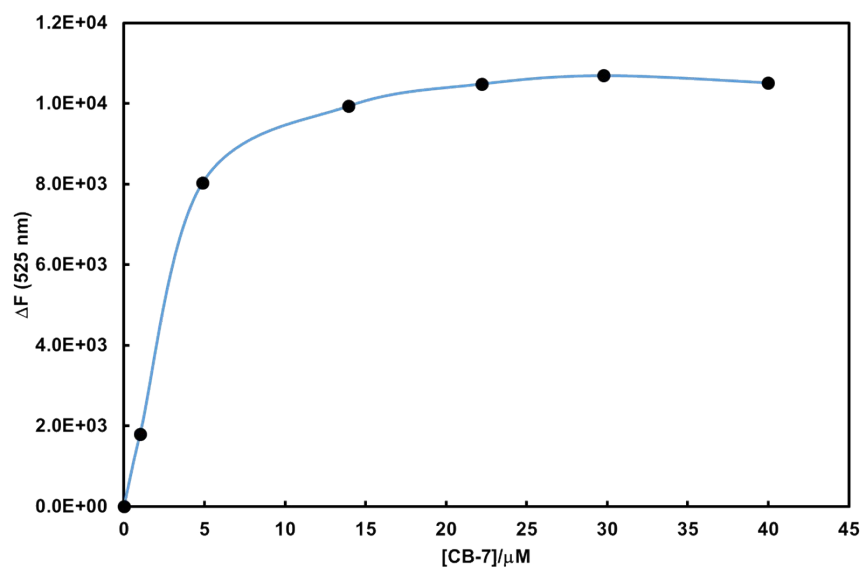

**Fig S2.** Fluorescence titration dot plot of MC3 of DMAPIP-b showing the complete binding at higher CB-7 concentration,  $\lambda_{\text{exc}} = 440 \text{ nm}$

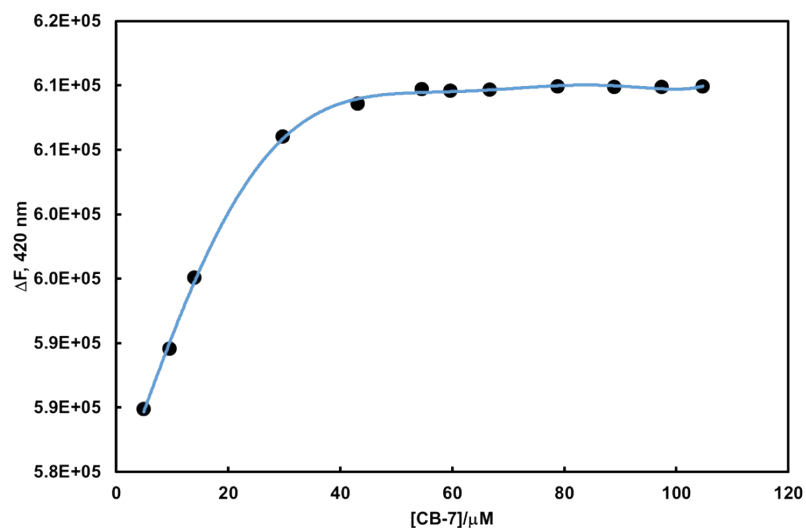

**Fig S3.** Fluorescence titration dot plot of MC2 of DMAPIP-c showing the complete binding at higher CB-7 concentration,  $\lambda_{\text{exc}} = 310 \text{ nm}$

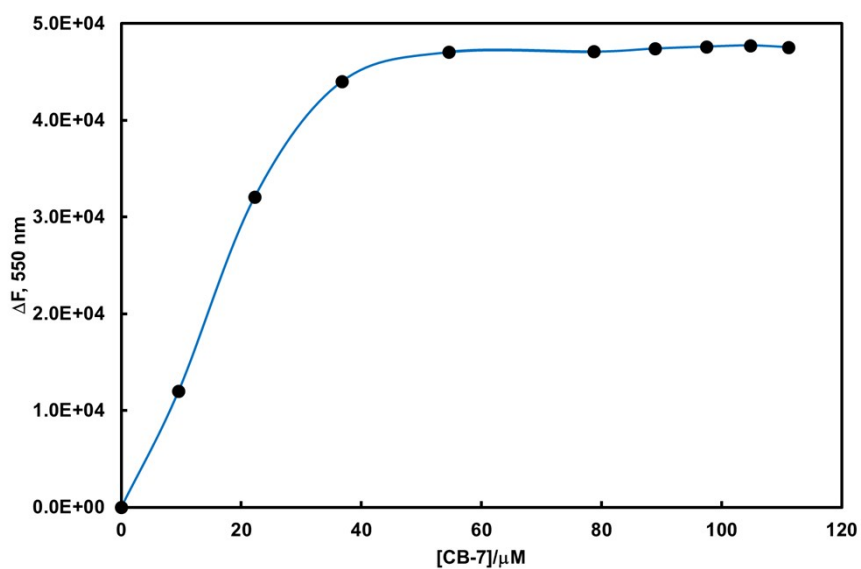

**Fig S4.** Fluorescence titration dot plot of MC3 of DMAPIP-c showing the complete binding at higher CB-7 concentration,  $\lambda_{\text{exc}} = 390 \text{ nm}$

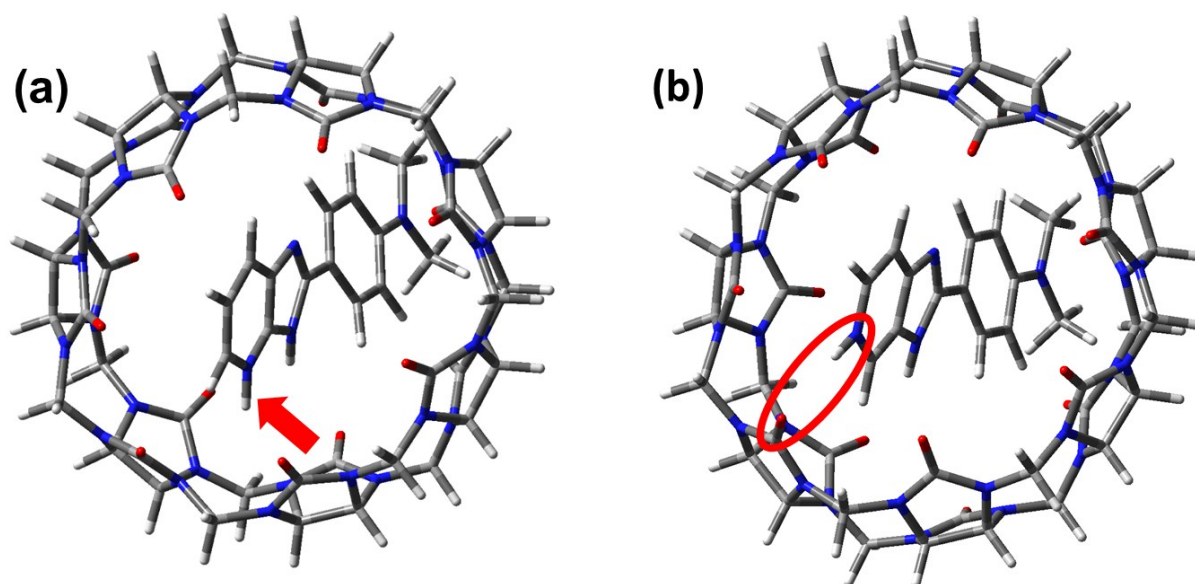

**Fig. S5** (a) The different binding mode of MC3 of (a) DMAPIP-b (The protonated pyridyl nitrogen present inside CB-7 cavity, (b) DMAPIP-c (The protonated pyridyl nitrogen present closer to carbonyl portal and favours hydrogen bonding),
